# Supplementary material for: The Epichloë festucae Antifungal Protein Efe-AfpA Protects Creeping Bentgrass (Agrostis stolonifera) from the Plant Pathogen Clarireedia jacksonii, the Causal Agent of Dollar Spot Disease
Source: MDPI journal article supplement (doi:10.3390/jof8101097), 2022-10-18
Supplement: s1 [file s1]

**The *Epichloe festucae* antifungal protein *Efe-AfpA* protects creeping bentgrass (*Agrostis stolonifera*) from the plant pathogen *Clarireedia jacksonii*, the causal agent of dollar spot disease**

**Patrick A. Fardella, Zipeng Tian, Bruce B. Clarke, Faith C. Belanger**

**Supplementary Materials**

**Table S1.** Sequences of oligonucleotide primers used in this study.

|                                                                                          | Forward primer, 5'-3'                       | Reverse primer, 5'-3'                                                |
|------------------------------------------------------------------------------------------|---------------------------------------------|----------------------------------------------------------------------|
| <b>Preparation of N-terminal Ala expression vector</b>                                   |                                             |                                                                      |
| Replacing N-terminal Ile with Ala in pPICZalphaA                                         | CGAGAAAAGAGCTACGTATG<br>AAGGAACATG          | AGAGATACCCCTTCTTCTTT<br>AG                                           |
| Cloning into pETite N-His SUMO Vector                                                    | CGCGAACAGATTGGAGGTGC<br>TACGTATGAAGGAACATGT | GTGGCGGCCGCTCTATTACT<br>AATGACACGTGACAGCTC                           |
| <b>Preparation of N-terminal Gly (Replacement) expression vector</b>                     |                                             |                                                                      |
| Replacing N-terminal Ala with Gly in pETite N-His Sumo Vector                            | GATTGGAGGTGGAACGTATG<br>AAGGAACATGTTC       | TGTTGCGGGTGAGCCTCA                                                   |
| <b>Preparation of N-Terminal Gly (Insertion) expression vector</b>                       |                                             |                                                                      |
| Inserting N-terminal Gly into N-terminal Ala pETite N-His SUMO Vector                    | GGAGCTACGTATGAAGGAACATG                     | ACCTCCAATCTGTTCGCG                                                   |
| <b>Preparation of N-Terminal Gly-Ser (Double Insertion) expression vector</b>            |                                             |                                                                      |
| Inserting N-Terminal Gly-Ser into N-terminal Ala pETite N-His Sumo Vector                | GGATCCGCTACGTATGAAGGAACATG                  | ACCTCCAATCTGTTCGCG                                                   |
| <b>Sumo forward primer</b>                                                               | ATTCAAGCTGATCAGACCCCTGAA                    |                                                                      |
| <b>Creating the pSK275:<i>Efe-AfpA</i> Vector</b>                                        |                                             |                                                                      |
| Amplifying pSK275 for production of the pSK275: <i>Efe-AfpA</i>                          |                                             |                                                                      |
|                                                                                          | ATGGTCTCTGCGATCACCAG                        | TACAAACAAAGATGCAAGAG<br>GCCATCTAGGCCATCAAGCTT<br>ATCGATACCGTCGACCTCG |
|                                                                                          | AGCTTGATGGCCTAGATGGC                        | ATTCGTTTTGGCTCTAGAA<br>CATGTTCCCTCATACTGAT<br>TATGAAGGGCTTGAGATGAT   |
| Amplify <i>Efe-AfpA</i> with pSK275 Overhang                                             | ATCACGTATGAAGGAACATG                        | ACCAAAAACCATTAATGCC<br>CTGGTGATCGCAGAGACCATC<br>TAATGACACGTGACAGCTC  |
| <b>Sequencing Primers for pSK275:<i>Efe-AfpA</i> to confirm <i>Efe-AfpA</i> Sequence</b> |                                             |                                                                      |

|                                                                    |                       |                         |
|--------------------------------------------------------------------|-----------------------|-------------------------|
| pSK275: <i>Efe</i> -AfpA F                                         | TTCGACCTATAAGCATCCGCC |                         |
| pSK275: <i>Efe</i> -AfpA R                                         |                       | GCAGCAGTTTGATAGTTATCCCT |
| <b>Spore PCR to Confirm Positive <i>Efe</i>-AfpA Transformants</b> |                       |                         |
| Efe-AfpA Forward/Reverse                                           | ATCACGTATGAAGGAACATG  | CTAATGACACGTGACAGCTC    |
| <b>Spore PCR to Confirm <i>Efe</i>-AfpA Sequence</b>               |                       |                         |
| pSK275: <i>Efe</i> -AfpA F/R                                       | TTCGACCTATAAGCATCCGCC | GCAGCAGTTTGATAGTTATCCCT |
| <b>Sequencing Primers for <i>Efe</i>-AfpA</b>                      |                       |                         |
| pSK275: <i>Efe</i> -AfpA F                                         | TTCGACCTATAAGCATCCGCC |                         |
| pSK275: <i>Efe</i> -AfpA R                                         |                       | GCAGCAGTTTGATAGTTATCCCT |
| pSK275: <i>Efe</i> -AfpA F 2                                       | ATGCAAATCACCACAGTTGCC |                         |
| pSK275: <i>Efe</i> -AfpA R 2                                       |                       | CTAATGACACGTGACAGCTC    |
| Efe-AfpA Forward 2                                                 | ATGCAAATCACCACAGTTGC  |                         |
| Efe-AfpA Reverse                                                   |                       | CTAATGACACGTGACAGCTC    |

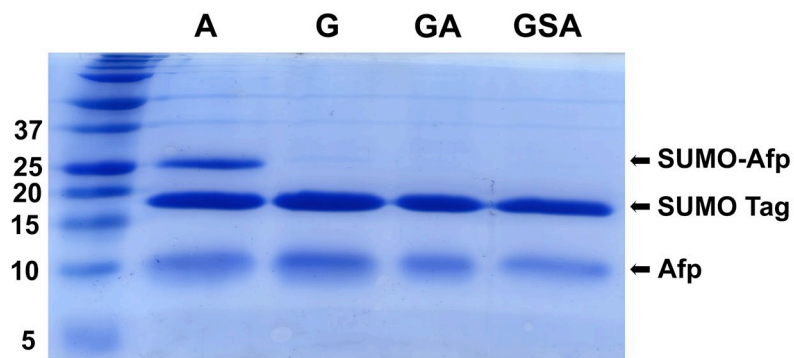

**Figure S1.** SDS-PAGE of N-terminal modified *Efe-AfpA* proteins expressed in *E. coli*. Proteins with the N-terminal modifications of A, G, GA, and GSA, were purified from *E. coli* lysates by binding to Talon Metal Affinity Resin. The purified proteins were then digested with the SUMO protease to remove the SUMO tag and the digested samples were subjected to SDS-PAGE. Arrows indicate the positions of the uncut SUMO-*Efe-AfpA* fusion protein, the released SUMO tag, and *Efe-AfpA* following digestion.

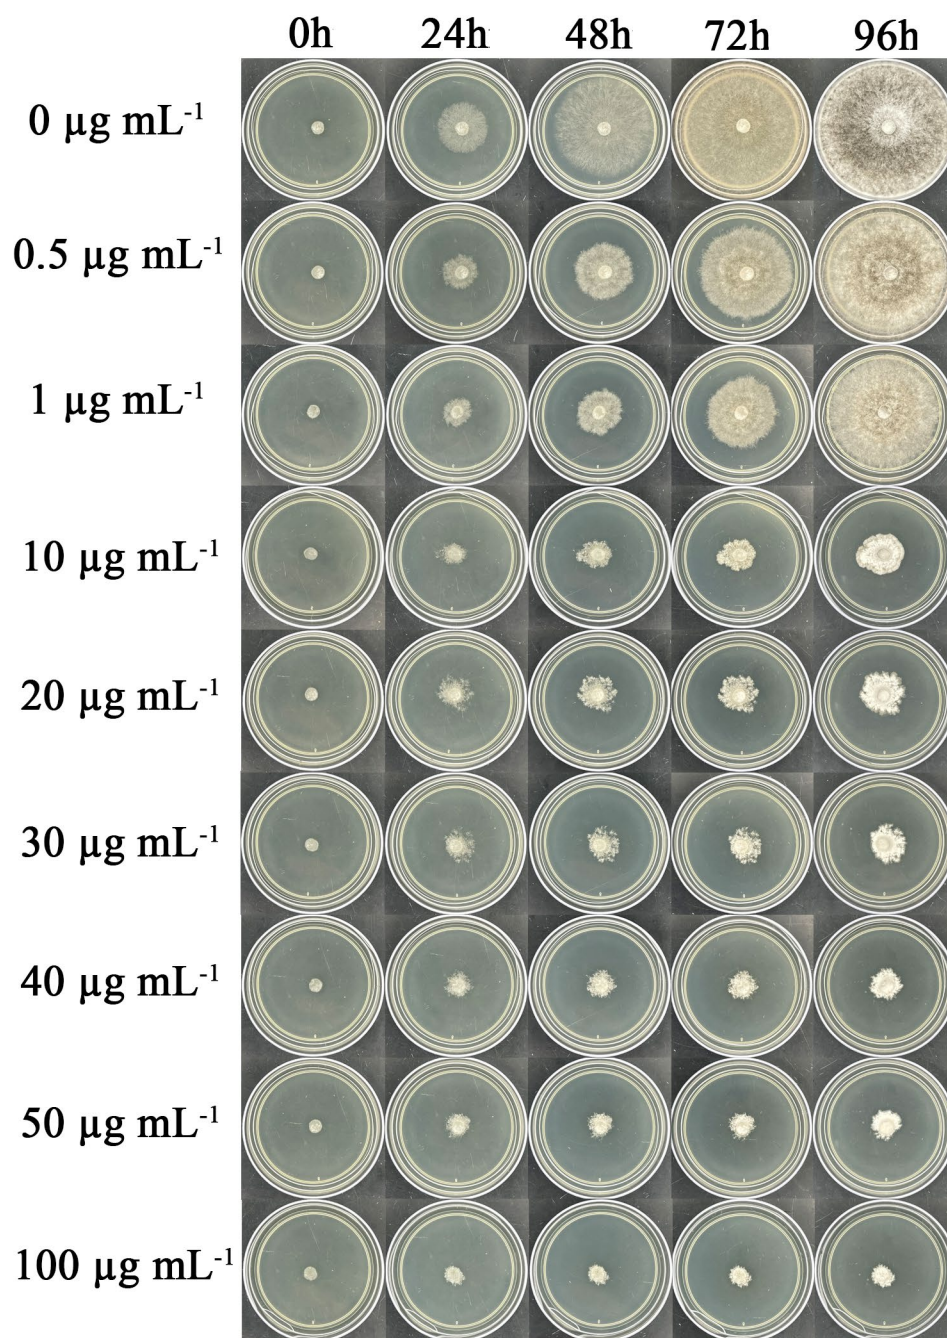

**Figure S2.** Effect of *Efe-AfpA* on *C. jacksonii* mycelial growth. *C. jacksonii* mycelial plugs were subcultured onto PDA plates amended with increasing concentrations of *Efe-AfpA*. The colony diameters were measured daily. The data presented are representative images of the three replicates.



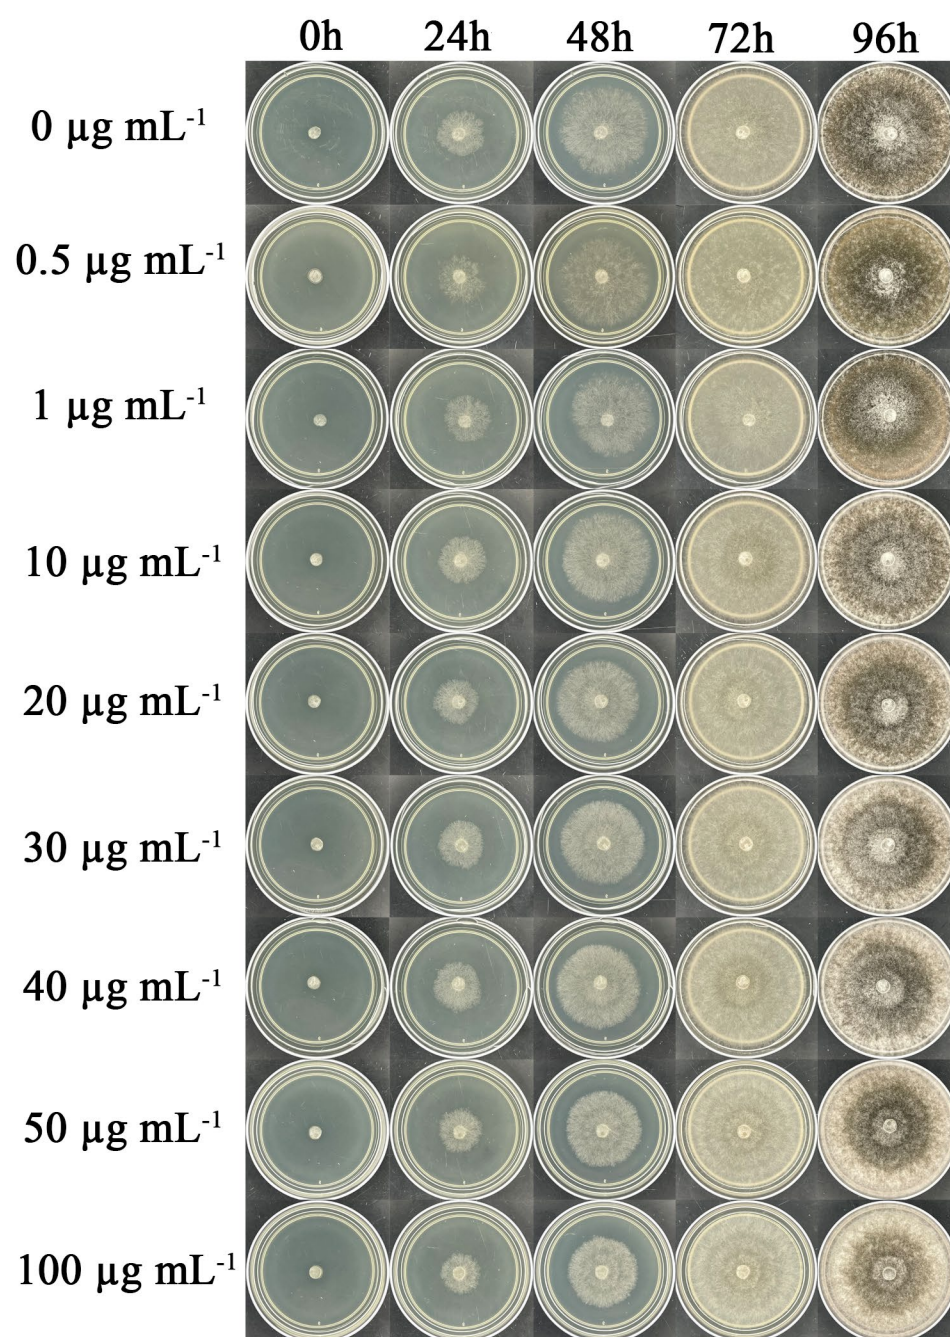

**Figure S3.** Effect of PAF on *C. jacksonii* mycelial growth. *C. jacksonii* mycelial plugs were subcultured onto PDA plates amended with increasing concentrations of PAF. The colony diameters were measured daily. The data presented are representative images of the three replicates.

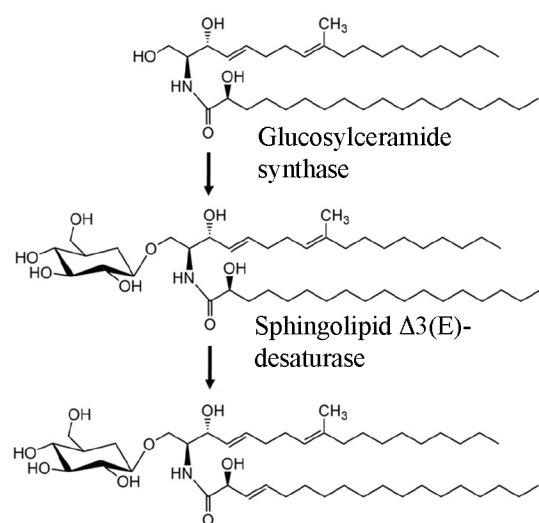

**Figure S4.** Final steps in the fungal sphingolipid biosynthetic pathway. Glucosylceramide synthase converts  $\alpha$ -OH-4- $\Delta^8$ -9, methyl-ceramide to  $\alpha$ -OH- $\Delta^4$ -8-9, methyl-glucosylceramide, which is converted to  $\Delta^3$ (E)-unsaturated glucosylceramide by sphingolipid  $\Delta^3$ (E)-desaturase.

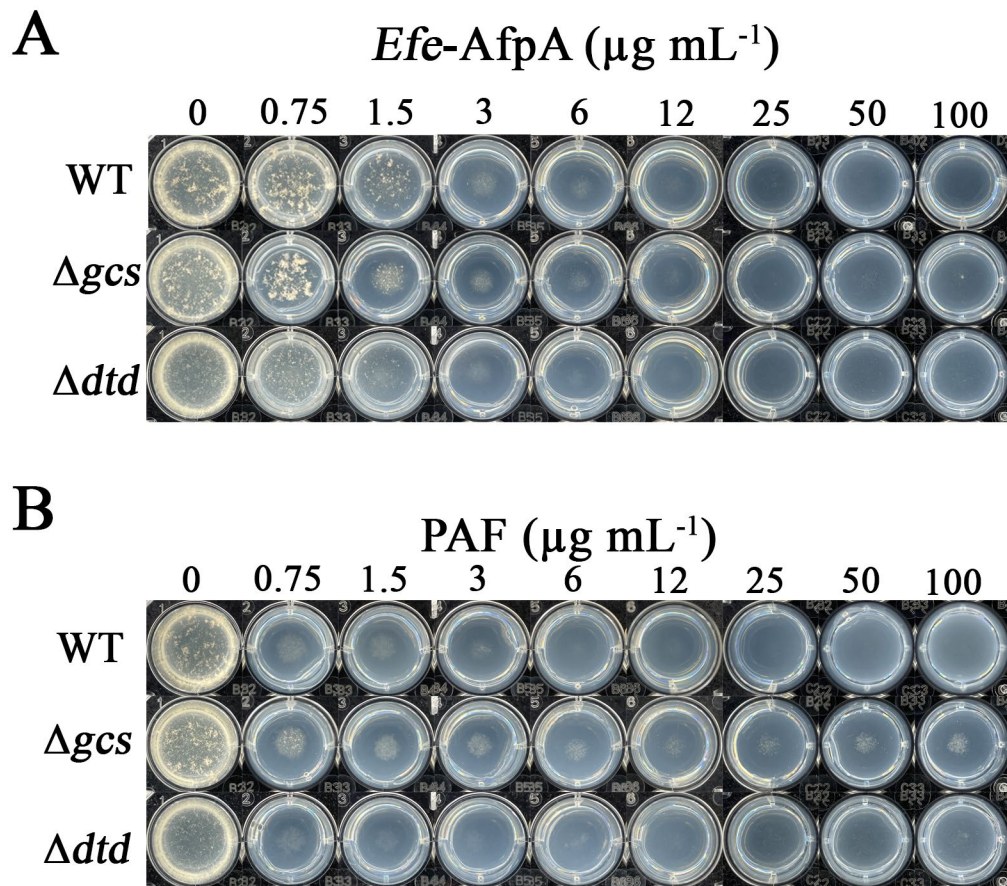

**Figure S5.** Plate assays of effect of *Efe-AfpA* (A) and PAF (B) on growth of *N. crassa* wild type and glucosylceramide mutants. Conidia were inoculated onto Vogel's media with increasing concentrations of either *Efe-AfpA* or PAF and photographed after 72 h at room temperature.

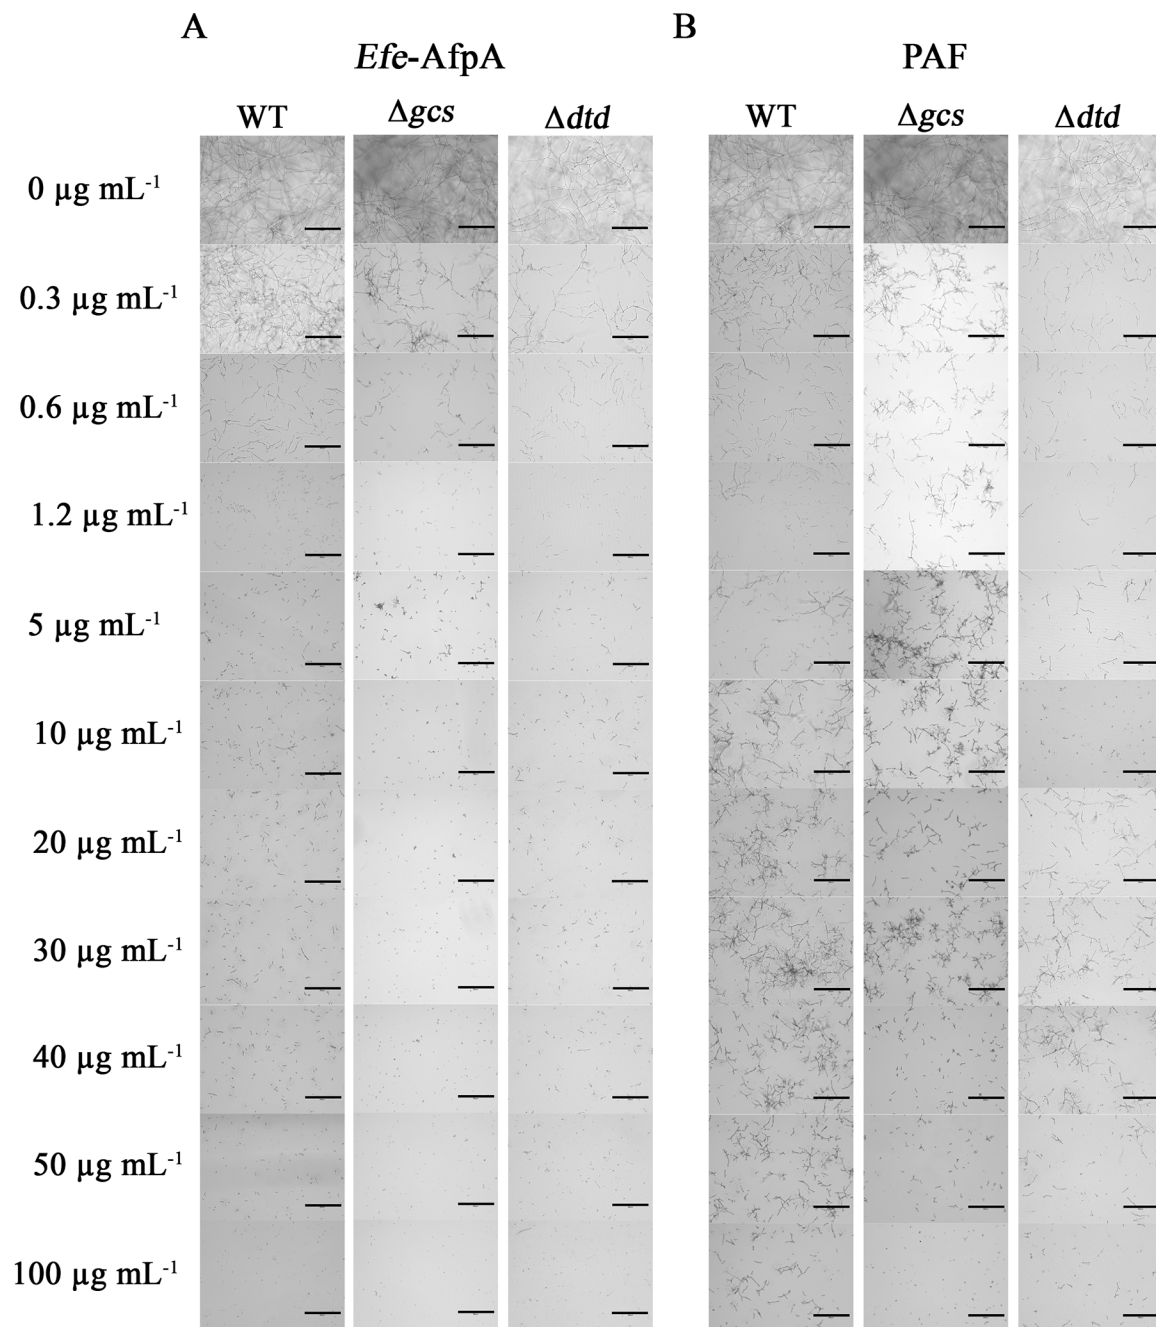

**Figure S6.** Microscopy of effect of *Efe-AfpA* (A) and PAF (B) on *N. crassa* wild type and glucosylceramide pathway mutants. Representative microscopy images of *N. crassa* conidia treated with increasing concentrations of *Efe-AfpA* or PAF. Bars are 300  $\mu\text{m}$ .



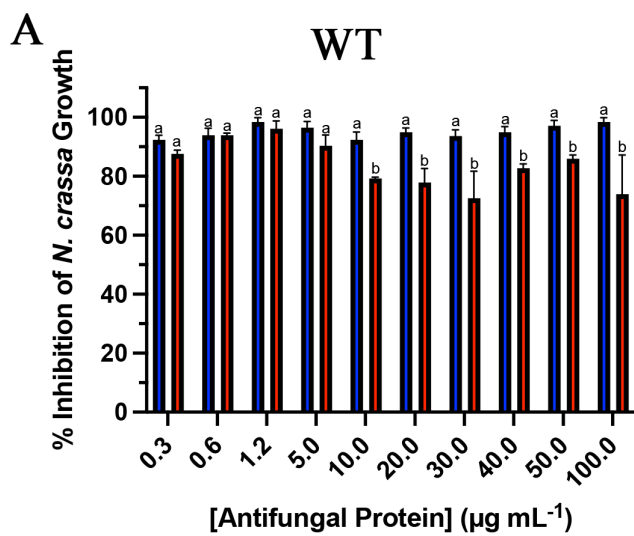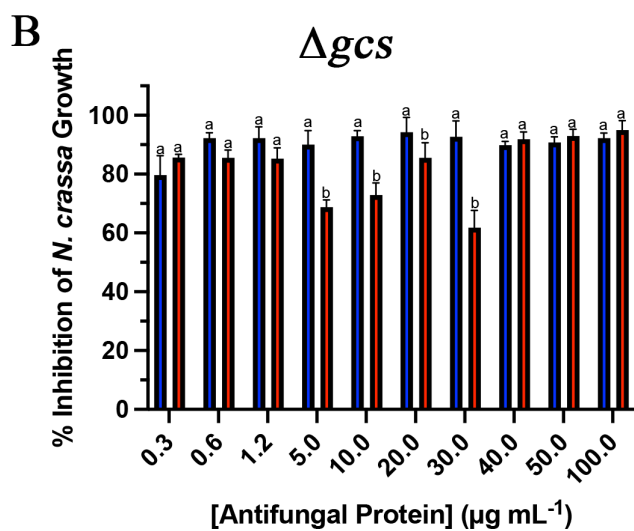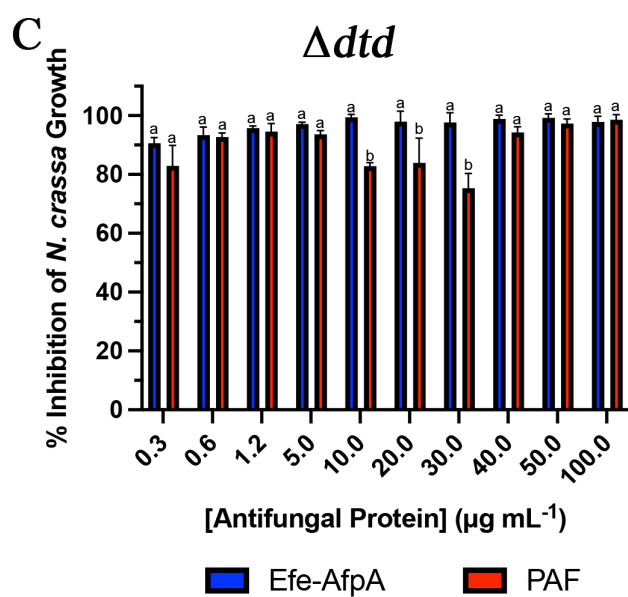

**Figure S7.** Comparison of activity of *Efe*-AfpA and PAF against *N. crassa* wild type and the glucosylceramide mutants  $\Delta gcs$  and  $\Delta dtd$ . This is the same data used in Figure 11 but graphed to directly compare *Efe*-AfpA and PAF.
